# Supplementary material for: Selection and Validation of Reliable Reference Genes for Gene Expression Studies in Different Genotypes and TRV-Infected Fruits of Peach (Prunus persica L. Batsch) during Ripening
Source: MDPI journal article supplement (doi:10.3390/genes13010160), 2022-01-17
Supplement: s1 [file s1]

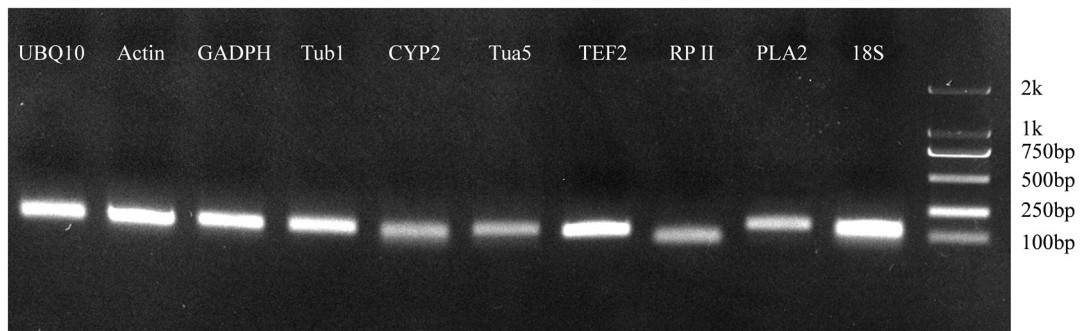

Figure S1. The amplification sizes and specificity of primers of ten reference genes. Amplified fragments of 10 reference genes exhibited by 1% agarose gel electrophoresis. M, DL 2000 maker.

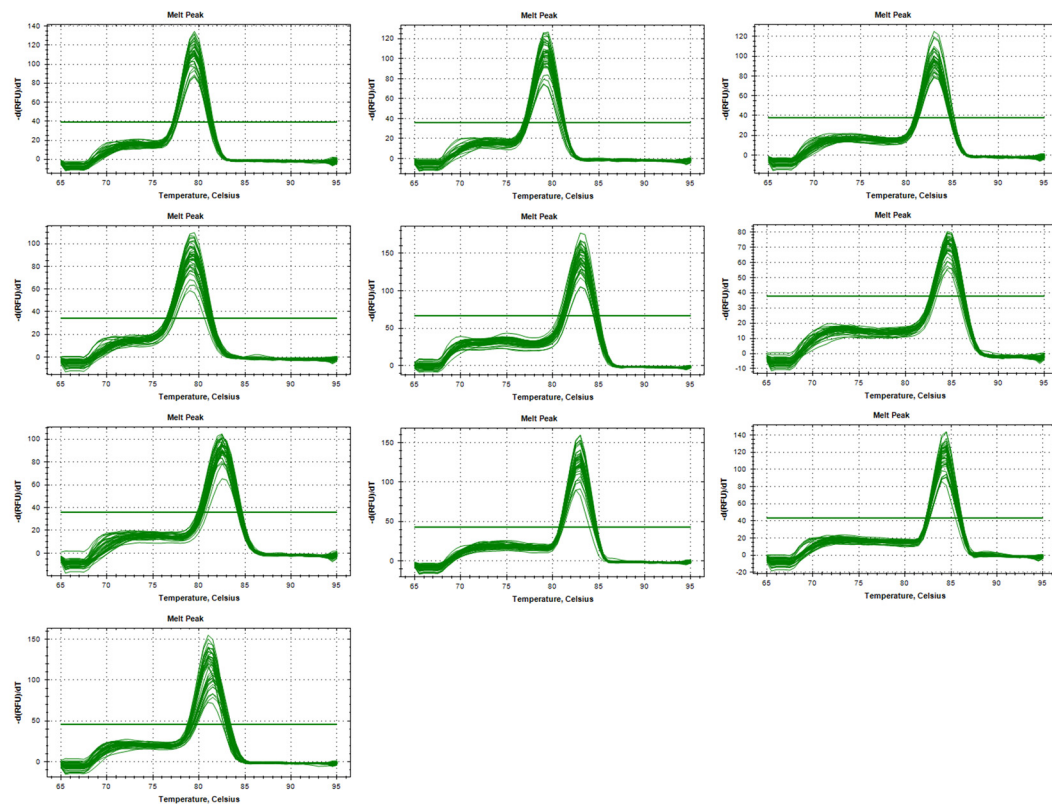

Figure S2. Melting curve of ten reference genes by RT-qPCR. A single peak indicated the specificity of primers.

Table S1. Sample sets in this study.

| Experimental samples sets | Variety    | Sampling types                              |
|---------------------------|------------|---------------------------------------------|
| TRV-infected fruits       | Rui Hong   | 0d, 2d, 4d, 6d                              |
|                           | Zao Feng   | 0d, 2d, 4d, 6d, 8d                          |
|                           | Wang       |                                             |
| different genotypes       | Rui Hong   | 0d, 2d, 4d, 6d, 8d                          |
|                           | Zao Feng   | 0d, 2d, 4d, 6d, 8d                          |
|                           | Wang       |                                             |
|                           | Babygold 5 | 0d, 2d, 4d, 6d, 8d, 10d, 12d, 14d, 16d, 18d |
|                           | Qin Wang   | 0d, 4d, 8d, 12d, 16d, 20d, 22d, 24d, 28d    |

Table S2. Delineations of ten candidate reference genes.

| Symbol | Gene name                                 | Primer sequence(5'-3')(Forwad/Reverse)                | Size(bp) | Efficiency(%) | R <sup>2</sup> | Reference                                            |
|--------|-------------------------------------------|-------------------------------------------------------|----------|---------------|----------------|------------------------------------------------------|
| 18S    | 18S ribosomal RNA                         | TAGTTGGTGGAGCGATTTGTCTG/<br>CTAAGCGGCATAGTCCCTCTAAG   | 114      | 1.8           | 0.99           | Tong et al., 2009, Xu et al., 2008, Kou et al., 2016 |
| Actin  | Actin protein                             | GATTCCGGTGCCCAGAAGT/<br>CCAGCAGCTTCCATTCCAA           | 144      | 1.8           | 0.99           | Leida et al., 2010, Tatsuki et al., 2013             |
| CYP2   | Cyclophilin 2                             | ACTCCAAAGCGTGTTAGAAAAGG/<br>GTCTCTTCCACCATAACGATAGG   | 120      | 1.7           | 0.99           | Tong et al., 2009, Kou et al., 2016                  |
| TEF2   | Translation enlongation factor 2          | GGTGTGACGATGAAGAGTGATG/<br>TGAAGGAGAGGGAAGGTGAAAG     | 129      | 1.8           | 0.99           | Tong et al., 2009, Kou et al., 2016                  |
| GAPDH  | Glyceraldehyde-3- phosphate dehydrogenase | ATTTGGAATCGTTGAGGGTCTTATG/<br>AATGATGTTGAAGGAAGCAGCAC | 121      | 1.8           | 0.99           | Tong et al., 2009, Kou et al., 2016                  |

|       |                        |                                                        |     |     |      |                                                                   |
|-------|------------------------|--------------------------------------------------------|-----|-----|------|-------------------------------------------------------------------|
| PLA2  | Phospholipase A2 beta  | TCGCCGTCGTTATCTTCTCC/<br>TACCGAATCCCAACAGAATTACAG      | 115 | 1.7 | 0.99 | Tong et al.,<br>2009,<br>Kou et al.,<br>2016                      |
| RP II | RNA polymerase subunit | TGAAGCATACACCTATGATGATGAAG/<br>CTTTGACAGCACCAGTAGATTCC | 128 | 1.8 | 0.99 | Tong et al.,<br>2009,<br>Kou et al.,<br>2016                      |
| Tua5  | Tublin alpha-5         | TTCTCTCTACTCATTCCCTCCTTG/<br>GATTGGTGTATGTTGGTCTCTCG   | 117 | 1.8 | 0.99 | Tong et al.,<br>2009, Li et<br>al., 2009 ,<br>Kou et al.,<br>2016 |
| Tub1  | Tublin beta-1          | CCGAGAATTGTGACTGCCTTCAAG/<br>AGCATCATCCTGTCTGGGTATTCC  | 124 | 1.8 | 0.99 | Tong et al.,<br>2009,<br>Kou et al.,<br>2016                      |
| UBQ10 | Ubiquitin 10           | AAGGCTAAGATCCAAGACAAAGAG/<br>CCACGAAGACGAAGCACTAAG     | 146 | 1.8 | 0.99 | Tong et al.,<br>2009,<br>Kou et al.,<br>2016                      |

---

Table S3. The information of the primers used for qRT-PCR validation.

| Symbol | Gene name                                 | Gene<br>number | Primer sequence(5'-<br>3')(Forwad/Reverse)        |
|--------|-------------------------------------------|----------------|---------------------------------------------------|
| PpACO1 | 1-aminocyclopropane-1-carboxylate oxidase | ppa008791m     | CCCCCATGCGCCACTCCA/<br>CATCACTGCCAGGGTTGTAAAAG    |
| PpEIN2 | ethylene insensitive 2                    | ppa000305m     | ACTACCAGCCAGCCACAATACA/<br>GCACCCAATGAAGAAGCGGATT |
| PpPL   | pectate lyase                             | ppa006392m     | ACAGGCAGAGGCTGGCAGATT/<br>GGAGGACCGCACCATAGCATTC  |
